1 **Rapid adaptation often occurs through mutations to the most highly conserved positions of the RNA**  
2 **polymerase core enzyme**

3 Yasmin Cohen and Ruth Hershberg<sup>†</sup>

4

5 Rachel & Menachem Mendelovitch Evolutionary Processes of Mutation & Natural Selection Research  
6 Laboratory, Department of Genetics and Developmental Biology, the Ruth and Bruce Rappaport Faculty  
7 of Medicine, Technion-Israel Institute of Technology, Haifa 31096, Israel.

8

9 <sup>†</sup>Corresponding author

10 Email: [ruthersh@technion.ac.il](mailto:ruthersh@technion.ac.il)

11

12

13

## 14 **Abstract**

15 Mutations to the genes encoding the RNA polymerase core enzyme (RNAPC) and additional housekeeping  
16 regulatory genes were found to be involved in rapid adaptation, in the context of numerous evolutionary  
17 experiments, in which bacteria were exposed to diverse selective pressures. This provides a conundrum, as  
18 the housekeeping genes that were so often mutated in response to these diverse selective pressures tend to  
19 be among the genes that are most conserved in their sequences across the bacterial phylogeny. In order to  
20 further examine this apparent discrepancy, we characterized the precise positions of the RNAPC involved  
21 in adaptation to a large variety of selective pressures. We found that different positions of the RNAPC are  
22 involved in adaptation to various stresses, with very little overlap found between stresses. We further found  
23 that RNAPC positions involved in adaptation tended to be more evolutionary conserved, were more likely  
24 to occur within defined protein domains, and tended to be closer to the complex's active site, compared to  
25 all other RNAPC positions. Finally, we could show that this observed trend of higher conservation of  
26 positions involved in rapid adaptation extends beyond the RNAPC to additional housekeeping genes.  
27 Combined, our results demonstrate that the positions that change most readily in response to well defined  
28 selective pressures exerted in lab environments are also those that evolve most slowly in nature. This  
29 suggests that such adaptations may not readily occur in nature, due to their antagonistically pleiotropic  
30 effects, or that if they do occur in nature, they are highly transient.

31

32

## 33 **Introduction**

34 Evolutionary experiments have been instrumental in enabling researchers to study evolution as it happens  
35 within controlled environments, and particularly in enabling the study of bacterial rapid adaptation  
36 (Kawecki, et al. 2012; Barrick and Lenski 2013; Katz, et al. 2021). Bacteria in particular are useful for  
37 evolutionary experiments, because they have short generation times, enabling to study their evolution over  
38 relatively large numbers of generations, in a relatively short amount of time. Many bacterial species can be  
39 frozen and later revived, enabling researchers to go “back in time” and compare an evolved strain to its  
40 ancestor. During evolutionary experiments bacterial populations are exposed to specific selective pressures  
41 and the manner in which they adapt to these pressures is examined. The advent of next generation whole  
42 genome sequencing technologies enabled many studies that characterized the adaptive mutations that occur  
43 in response to specific selective pressures. Given that *Escherichia coli* is the most commonly used bacterial  
44 model organisms, a substantial fraction of such studies were carried out in *E. coli*.

45 Evolutionary experiments have highlighted the remarkable capability of bacteria to undergo rapid  
46 adaptation. Such rapid adaptation often occurs through mutations to very central housekeeping genes  
47 (reviewed in (Hershberg 2017) and (Maddamsetti, et al. 2017)). The most obvious example of this trend is  
48 adaptations occurring within the RNA polymerase core enzyme (RNAPC) genes, *rpoB* and *rpoC*. The *rpoB*  
49 gene encodes the RNAPC’s  $\beta$  subunit and *rpoC* encodes its  $\beta'$  subunit. These two subunits occupy 80% of  
50 the total mass of the core enzyme and together form its active site (Sutherland and Murakami 2018).  
51 Mutations within *rpoB* and *rpoC* were shown to be involved in adaptation to a variety of selective pressures  
52 including exposure to lethal doses of antibiotics (Severinov, et al. 1993; Reynolds 2000; Delgado, et al.  
53 2001; Srivastava, et al. 2012; Degen, et al. 2014), high temperatures (Tenailon, et al. 2012), low nutrients  
54 (Conrad, et al. 2010), exposure to radiation (Bruckbauer, et al. 2019), and prolonged resource exhaustion  
55 (Avrani, et al. 2017; Gross, et al. 2020).

56 The fact that housekeeping genes such as the RNAPC tend to rapidly acquire adaptive mutations, altering  
57 their sequences, in response to a large variety of selective pressures, stands in apparent contrast to the high  
58 levels of conservation of these genes. Housekeeping genes in general and the RNAPC in particular tend to  
59 be extremely well conserved in their sequences, structure and function from bacteria to humans  
60 (Archambault and Friesen 1993; Zhang, et al. 1999). This conservation is extensive enough to allow the  
61 bacterial RNA polymerase to serve as a model for understanding the basic principles at work in all cellular  
62 RNA polymerases (Borukhov and Nudler 2008). Within bacteria the sequences of *rpoB* and *rpoC* are

63 conserved enough to enable their usage as a slowly evolving gene markers in the study of bacterial  
64 phylogeny (Lan, et al. 2016).

65 Here, we characterize the positions of the RNAPC involved in known adaptations and compare them to  
66 positions in which no such adaptations have so far been observed. This allows us to show that positions  
67 involved in adaptation tend to be even more conserved than other positions of the RNAPC and tend to be  
68 located more closely to the protein complex's active site. The finding that adaptations tend to occur within  
69 more conserved positions also extends to additional proteins. Our results further indicate that a unique set  
70 of RNAPC positions are involved in adaptation to different conditions. While adaptations in general tend  
71 to occur close to the RNAPC active site, adaptations to different conditions tend to cluster to different parts  
72 of the complex. Outliers to these reported trends are adaptations occurring in response to heat shock, which  
73 do not tend to occur within more conserved positions, and which do not tend to cluster close to each other  
74 or to the protein's active site.

75

## 76 **Materials and Methods**

### 77 **Datasets**

78 *E.coli* K12 MG1655 protein sequences were downloaded from the National Center for Biotechnology  
79 Information (NCBI) database (May 2019) (Coordinators 2018). The protein sequences of 44,048 fully  
80 sequenced bacterial strains were downloaded from the Ensembl database (March 2020) (Yates, et al. 2020).

### 81 **Identification and realignment of orthologous genes.**

82 To identify the orthologs of RpoB, RpoC and the additional examined genes, we carried out BLAST  
83 (Altschul, et al. 1990) searches using the *E. coli* K12 MG1655 protein sequence as a query against the  
84 Ensembl collection of proteomes. Best bi-directional hits were required in order to maintain an identified  
85 ortholog for further analyses. Each identified ortholog was re-aligned with the *E. coli* K12 MG1655  
86 sequence, using the Needleman-Wunsch pairwise alignment algorithm, as implemented by the EMBOSS  
87 needle program (Rice, et al. 2000) function in Biopython (Cock, et al. 2009). This enabled us to compute  
88 the optimal alignment (including gaps) of each two sequences along their entire length. Alignments that  
89 had less than 30% overall sequence identity across their entire length were removed from consideration. To  
90 avoid biases stemming from over-representation of certain closely related groups of strains within our  
91 dataset, with identical RpoB, RpoC or other gene protein sequences, identical sequences we combined into  
92 a single representative. **Table S1** summarizes the number of alignments obtained following this procedure,  
93 for each of the studied genes.

## 94 **Z-score calculations**

95 In order to be able to combine different genes that vary in the distributions of the conservation levels of  
96 their positions, we calculated for each gene separately a Z-score for each of its positions as:

$$97 \quad Z = \frac{x - \mu}{\sigma}$$

98 Where:  $x$  denotes the percentage of strains in which that position is conserved,  $\mu$  denotes the mean  
99 percentage conservation across all positions of that protein, and  $\sigma$  denotes the standard deviation around  
100 that mean. Z score values were then combined across genes allowing us to compare them between positions  
101 in which adaptations occurred and all other positions.

## 102 **Mapping RpoB and RpoC positions onto the RNA polymerase molecular structure**

103 We mapped the RpoB and RpoC positions involved in adaptation onto the three-dimensional structure of  
104 the RNA polymerase complex of *E. coli* (Protein Data Bank; 3LUO) (Opalka, et al. 2010). The mutations  
105 were mapped and visualized using PyMol (The PyMOL Molecular Graphics System, Version 2.4,  
106 Schrödinger, LLC) and Pyrosetta (Version 2.6) (Chaudhury, et al. 2010). The distance between the  
107 residues and the active site was measured with the PyMol distancetoatom function.

108 In order to classify positions according to whether they fall within an annotated protein domain, the domain  
109 annotation was taken from UniPort Knowledgebase (UniProt 2021), entries P0A8V2 (RpoB) and P0A8T7  
110 (RpoC).

## 111 **Results**

### 112 **Little overlap in the RNA polymerase core enzyme positions involved in adaptation to** 113 **various selective pressures.**

114 We carried out a literature survey to annotate protein positions involved in adaptation to a variety of  
115 selective pressures, within the RNA polymerase core enzyme (RNAPC) proteins RpoB and RpoC, in the  
116 model bacterium *Escherichia coli*. This resulted in the identification of 128 positions (**Table 1**). Of these  
117 positions, 38 were involved in the acquisition of antibiotic resistance. While 90 were involved in adaptation  
118 to other selective pressures, such as survival under prolonged resource exhaustion, adaptation to growth  
119 within poor nutrient media, and heat shock.

120 It is important to distinguish between antibiotic resistance and other types of adaptation, as in the case of  
121 antibiotic resistance the reason for the occurrence of the mutations within the RNAPC is different.

122 Specifically, antibiotic resistance adaptations occur within the RNAPC genes, because the antibiotics they  
123 confer resistance to themselves target those genes. Mutations that confer resistance are those that alter the  
124 structure of the protein so that the antibiotic can no longer effectively bind it (Spratt 1994). In contrast, an  
125 RNAPC mutation that provides an advantage under, for example, prolonged resource exhaustion likely  
126 owes its adaptive effect to the effects it has on the function of the RNAPC in regulating gene expression.  
127 Strikingly, we observe very little overlap in the RNAPC positions involved in adaptation to different  
128 selective pressures. Of the 128 positions in our dataset of positions involved in adaptation, only one is  
129 involved in adaptation to two different non-antibiotic related selective pressures, and only two are involved  
130 in both antibiotic resistance and an adaptation to a second selective pressure.

### 131 **Adaptation tends to occur within more conserved positions of the RNA polymerase core enzyme**

132 Next, we examined whether the 128 RpoB and RpoC positions in which adaptations were found, differed  
133 in their levels of conservation, compared to the remaining RpoB and RpoC positions. To do so, the *E. coli*  
134 K12 MG1655 RpoB and RpoC sequences were compared, using BLAST, at the protein level against a  
135 database of the full proteomes of 44,048 fully sequenced bacterial genomes. Only bidirectional best hits  
136 were maintained. Each of the identified RpoB and RpoC sequences, was then realigned at the protein level  
137 against their *E. coli* K12 MG1655 ortholog, using the Needleman-Wunsch pairwise alignment algorithm,  
138 as implemented by the EMBOSS needle program. This enabled us to compute the optimal alignment  
139 (including gaps) of each two sequences along their entire length. In order to avoid biases, resulting from  
140 over sampling of closely related bacterial strains with identical RNAPC genes, if two RpoB or two RpoC  
141 orthologs were found to be identical in their sequences, only one of the two was maintained. Finally, we  
142 filtered out alignments that had less than 30% overall sequence identity across their entire length. From the  
143 resulting 8163 RpoB alignments and 7727 RpoC alignments we calculated the percentage of strains in  
144 which each position of the *E. coli* K12 protein sequence was conserved. We then compared levels of  
145 conservation, between the 128 positions that were shown to be involved in rapid adaptation, and the  
146 remaining protein positions. This enabled us to demonstrate that positions in which adaptations are found  
147 tend to be more conserved than all remaining positions (**Figure 1**). For example, 49% and 23% of positions  
148 involved in adaptation within RpoB and RpoC respectively are conserved in 100% of the examined strains.  
149 At the same time only 19% and 13% of all other positions within these two genes are so conserved. The  
150 observed difference in levels of conservation between positions known to be involved in adaptation, and  
151 all remaining positions is statistically significant ( $P \ll 0.001$  for RpoB, and  $P = 0.003$  for RpoC, according  
152 to a one-tailed non-paired Mann-Whitney test).

153 For adaptation to antibiotic resistance, heat shock and prolonged resource exhaustion, sufficient positions  
154 are involved to test differences in conservation separately for each selective pressure. Adaptations to

155 prolonged resource exhaustion and adaptations leading to antibiotic resistance occur at positions that were  
156 more conserved than positions at which no adaptations were found ( $P \ll 0.001$  for adaptations occurring  
157 within RpoB and  $P < 0.008$ , for adaptations occurring within RpoC, **Figure S1**). In contrast no significant  
158 difference was found in the conservation of positions involved in adaptation to heat shock and positions  
159 with no observed adaptation (**Figure S1**).

160 The *Proteobacteria* phylum to which *E. coli* belongs is one of the most well studied of bacterial phyla  
161 (Gupta 2000). As a result, sequences belonging to this phylum are likely to be over-represented within our  
162 database. As this could potentially bias results, we aimed to verify that RNAPC positions tend to be more  
163 conserved across all phylogenetic distances. To do so, we separated the 8163 of RpoB and 7727 of rpoC  
164 alignments we obtained, according to their percent identity, into 10% sized bins (e.g. 90-100%, 80-90%  
165 etc...). We then examined whether positions in which adaptations were found in *E. coli* tended to be more  
166 conserved, than positions in which no adaptations were observed, based on each group of alignments  
167 separately. In the case of RpoC, positions involved in adaptation are significantly more conserved than  
168 remaining positions, for all phylogenetic distances ( $P < 0.05$ , for all comparisons, **Figure S2**). In the case  
169 of RpoB, this was true ( $P < 0.001$ , **Figure S2**) for all but the most closely related alignments (90-100%  
170 identity,  $P = 0.1237$ ). Our results thus demonstrate that positions involved in adaptation tend to be more  
171 conserved than other positions, across all phylogenetic distances.

## 172 **Positions involved in adaptation tend to fall within defined functional domains**

173 In addition to tending to be more conserved, RNAPC positions at which adaptations occur also tend to more  
174 often fall within residues belonging to defined functional domains (**Table S2**) (Ponting and Russell 2002;  
175 UniProt 2021). This is true in general, when all sites are considered together ( $P \ll 0.001$  for RpoB and  $P$   
176 = 0.0011 for RpoC, according to a Mann Whitney test), and is also true when we consider antibiotic  
177 resistance adaptations ( $P \ll 0.001$  for RpoB and  $P = 0.0085$  for RpoC) and resource exhaustion adaptations  
178 ( $P \ll 0.001$  for RpoB and  $P = 0.0016$  for RpoC) separately. However, heat shock adaptations do not show  
179 a similar tendency to be enriched within defined functional domains ( $P = 0.1405$  for RpoB and  $P = 0.2645$   
180 for RpoC).

## 181 **Positions involved in adaptation tend to be located close to the RNAPC active site**

182 In order to further characterize the RNAPC positions involved in adaptation, we located them on the RpoB  
183 and RpoC complex solved protein structure (Protein Data Bank; 3LUO) (Opalka, et al. 2010) (**Figure 2A**).  
184 In general, positions involved in adaptation tended to be closer to the enzyme's active site than other  
185 positions ( $P \ll 0.001$ , for both RpoB (**Figure 2B**) and RpoC (**Figure 2C**), and **Table S2**. see Materials and  
186 Methods). When considered separately, resource exhaustion adaptations and antibiotic resistance

187 adaptations tend to be located closer to the complex's active site than positions that are not involved in  
188 adaptation ( $P < 0.001$ , for all comparisons). At the same time, in agreement with their lower levels of  
189 conservation and lack of tendency to be enriched within functional domains, positions involved in heat  
190 shock adaptation do not display a strongly significant enrichment for proximity to the active site ( $P = 0.0253$   
191 for RpoB and  $P = 0.3509$  for RpoC).

### 192 **Excluding heatshock adaptations, positions involved in adaptation to the same condition tend to be** 193 **clustered on the protein structure**

194 Resource exhaustion adaptations (**Figure 3A**), and minimal media adaptations (**Figure 3B**) tended to each  
195 separately cluster onto distinct close regions of the protein structure. Similarly, positions involved in  
196 adaptation to acquire resistance to the same antibiotic, also tend to cluster together (**Figure 3C**). In contrast,  
197 unlike most positions involved in adaptation, positions involved in adaptation to heat shock are more  
198 dispersed over the entire RpoB and RpoC complex structure (**Figure 3D**).

### 199 **Resource exhaustion adaptations within additional genes, also tend to occur within more** 200 **conserved positions**

201 We have been studying *E. coli* adaptation under prolonged resource exhaustion. In our experiments we  
202 found very high levels of convergence, with mutations often occurring within the same loci, across  
203 independently evolving populations (Avrani, et al. 2017; Katz, et al. 2021). Such convergence is widely  
204 considered to be a signal of adaptation. 19 genes (other than *rpoB* and *rpoC*) were identified in which  
205 mismatch mutations occurred across all five of our populations, indicating that these mutations are adaptive  
206 under resource exhaustion (**Table S1**). To examine whether the positions of these genes at which  
207 convergent mutations occurred tend to be more conserved than other positions of these genes, we first  
208 carried out BLAST searches, using each gene as a query and requiring bi-directional best hits, as done  
209 before for RpoB and RpoC. Bacterial strains for which we could not find an RpoB or RpoC ortholog were  
210 removed from consideration. Alignments were then refined using the Needleman-Wunsch algorithm, with  
211 at least 30% identity required, and identical alignments were clustered together into a single alignment. The  
212 numbers of bacterial strains in which we found each gene initially, and the number of ultimate alignments  
213 we were left to work with in the end are summarized in **Table S1**.

214 In contrast to RpoB and RpoC, here, for each gene, only a handful of positions were predicted to be involved  
215 in adaptation. In order to obtain sufficient power to examine whether positions likely involved in adaptation  
216 tended to be more conserved, we had to therefore combine data across our 15 genes. To do so, while not  
217 biasing our results due to differences in overall conservation between the proteins, we normalized within  
218 each gene the calculated levels of conservation of each position by calculating a Z-score (**Table S3**,



219 **Materials and Methods**). Once conservation levels were normalized, they could then be combined across  
220 genes. We found that the positions within convergently mutated genes, in which resource exhaustion  
221 mutations occurred were significantly more conserved than remaining positions within the same genes ( $P$   
222  $\ll 0.001$ , according to a one-tailed non-paired Mann-Whitney test).

## 223 **Discussion**

224 We demonstrate that adaptation within the RNAPC and additional housekeeping genes tends to occur  
225 within the most conserved and evolutionarily constrained positions of these highly conserved proteins. This  
226 raises a conundrum: How is it possible for these positions to change so rapidly in response to a variety of  
227 selective pressures, yet remain so highly conserved over longer evolutionary time scales? The answer to  
228 this question may relate to pleiotropy (Cooper and Lenski 2000; MacLean, et al. 2004; Kvittek and Sherlock  
229 2013). The specific changes to the RNAPC and additional master regulatory genes that are adaptive under  
230 a specific condition, may have strongly deleterious pleiotropic effects under many, if not all other  
231 conditions. After all, master regulators in general, and the RNAPC in particular regulate the expression of  
232 large chunks of the transcriptome. In lab experiments, bacteria are generally exposed to relatively simple,  
233 strong and constant selective pressures. The selective pressures faced within more natural environments are  
234 likely far more complex, with several different factors exerting contradictory pressures simultaneously and  
235 / or with selective pressures that change with time. Adaptations of the kind that arise so easily during lab  
236 evolution, may not be so easily permitted within natural environments, due to their pleiotropic effects.  
237 Additionally, if such adaptations do occur in response to a specific set of conditions, they may prove to be  
238 highly transient, rapidly decreasing in frequency once conditions change. Supporting this, we recently  
239 demonstrated such transience of RNAPC adaptations arising under resource exhaustion. We showed that  
240 bacteria exposed to prolonged resource exhaustion adapt via mutations to the RNAPC, but that these  
241 mutations do not tend to fix across an entire population (Avrani, et al. 2020). Since these mutations carry  
242 pronounced costs to fitness under conditions of resource abundance and rapid growth, once bacteria are  
243 transferred into fresh media, rare clones that do not carry an RNAPC adaptation outcompete the clones that  
244 do carry these adaptations, leading to rapid reductions in the frequencies the RNAPC adaptations (Avrani,  
245 et al. 2020). If RNAPC adaptations are in general highly transient, it may explain why the sites in which  
246 they occur can remain largely conserved, when one examines longer evolutionary timescales.

247 We find no overlap in the positions of the RNAPC involved in adaptation to various selective pressures,  
248 indicating that different selective pressures demand different specific changes to the RNAPC. We further  
249 find that for most conditions, sites involved in adaptation tend to be clustered on the protein structure.

250 Combined, these results strongly suggest that for most conditions, very specific changes to the RNAPC are  
251 adaptive.

252 The specificity of sites involved in adaptation under each selective pressure may suggest that adaptation to  
253 each pressure occurs through changing a specific function of the RNAPC, different from the function  
254 changed in response to a different selective pressure. In other words it is possible that the reason that  
255 specific positions are involved in adaptation to condition A, while different ones are involved in adaptation  
256 to position B, is that the condition A adaptations drive specific gene expression changes adaptive under  
257 condition A, while position B adaptations drive different changes to gene expression, adaptive under  
258 condition B. A second possible reason for the specificity of the adaptive mutations, is that while the same  
259 ultimate adaptive outcome is always reached, the way to reach that outcome is condition dependent. In  
260 other words, the adaptive outcome may involve the same specific change to transcriptional kinetics, under  
261 both conditions A and B. However, due to changes in the structure of the transcriptional regulatory network  
262 under the different conditions, inducing the adaptive end result might involve different mutations in  
263 condition A, compared to condition B. Finally, high levels of specificity may also be explained not through  
264 the need to change a specific function, but through the need to prevent antagonistically pleiotropic effects  
265 (Cooper and Lenski 2000; MacLean, et al. 2004; Kvitek and Sherlock 2013). It is possible that under  
266 different selective pressures, adaptive mutations always carry out a similar function (e.g. altering the  
267 kinetics of transcription in a similar manner), yet different specific mutations can be tolerated under each  
268 condition, due to differences in their pleiotropic effects. In other words, it is possible that the positions  
269 involved in adaptation to condition A are ones in which mutations can alter the kinetics of transcription, in  
270 a manner that is adaptive across conditions, while at the same time minimizing changes to gene expression  
271 that would be specifically harmful under condition A. A combination of all these explanations may also be  
272 possible.

273 Some clues as to the consequences of the RNAPC adaptive mutations may be gleaned from their location  
274 on its structure. In the case of antibiotic resistance adaptations, the reasons for their location are easy to  
275 predict: Resistance adaptations will likely occur within the same region of the complex that the antibiotic  
276 binds, and work by reducing the ability of the antibiotic to bind its target. When it comes to other types of  
277 adaptations it is less straight forward to predict their precise adaptive effect. Conard et al. revealed the  
278 adaptive role of minimal media RNAPC adaptations in altering transcriptional kinetics, by decreasing  
279 the longevity of open complex. Here, we found that resource exhaustion RNAPC adaptations are  
280 located within the complex's clamp domain, which has been implicated in involvement in several  
281 crucial aspects of the transcription process, including transcription initiation and elongation (Duchi, et  
282 al. 2018).

283 Mutations to the RNAPC involved in adaptation to heat shock, behave differently than those involved in  
284 adaptation to other conditions. While adaptation to heat shock appears to occur within the RNAPC in a  
285 highly convergent manner, many different specific mutations were found to occur across independently  
286 evolving populations (Tenailon, et al. 2012). This stands in contrast adaptation to prolonged resource  
287 exhaustion, where the same specific sites tend to be mutated across independently evolving populations  
288 (Avrani, et al. 2017; Katz, et al. 2021). The many heat shock RNAPC adaptations do not tend to occur  
289 within significantly more conserved positions, are not enriched within known functional domains or in  
290 proximity to the active site, and they are not clustered together on the complex's structure. This appears to  
291 suggest that unlike adaptations to other conditions, heat shock adaptations may be acting through a less  
292 specific mechanism, affecting some more general trait of the RNAPC, that does not require changes to very  
293 specific sites, located at the heart of the complex. Intriguingly, studies into the effects of RNAPC heat shock  
294 adaptations suggested that these adaptations change the expression of hundreds of genes back towards the  
295 transcriptional program of pre-stressed bacteria (Rodriguez-Verdugo, et al. 2016). It will be interesting to  
296 understand how this can be achieved by such a large variety of non-specific mutations, located all over the  
297 RNAPC's structure.

## 298 **Acknowledgments**

299 This work was supported by an ISF grant (No. 1860/21, to R.H.) and by the Rappaport Family Institute  
300 for Research in the Medical Sciences (to R.H.). The described work was carried out in the Rachel &  
301 Menachem Mendelovitch Evolutionary Process of Mutation & Natural Selection Research Laboratory.

302

## 303 **References**

- 304 Altschul SF, Gish W, Miller W, Myers EW, Lipman DJ. 1990. Basic local alignment search tool. *J Mol*  
305 *Biol* 215:403-410.
- 306 Archambault J, Friesen JD. 1993. Genetics of eukaryotic RNA polymerases I, II, and III. *Microbiol Rev*  
307 *57*:703-724.
- 308 Avrani S, Bolotin E, Katz S, Hershberg R. 2017. Rapid Genetic Adaptation during the First Four Months  
309 of Survival under Resource Exhaustion. *Mol Biol Evol* 34:1758-1769.
- 310 Avrani S, Katz S, Hershberg R. 2020. Adaptations Accumulated under Prolonged Resource Exhaustion  
311 Are Highly Transient. *mSphere* 5.
- 312 Barrick JE, Lenski RE. 2013. Genome dynamics during experimental evolution. *Nat Rev Genet* 14:827-  
313 839.
- 314 Borukhov S, Nudler E. 2008. RNA polymerase: the vehicle of transcription. *Trends Microbiol* 16:126-  
315 134.

- 316 Bruckbauer ST, Trimarco JD, Martin J, Bushnell B, Senn KA, Schackwitz W, Lipzen A, Blow M, Wood  
317 EA, Culberson WS, et al. 2019. Experimental Evolution of Extreme Resistance to Ionizing Radiation in  
318 *Escherichia coli* after 50 Cycles of Selection. *J Bacteriol* 201.
- 319 Charusanti P, Conrad TM, Knight EM, Venkataraman K, Fong NL, Xie B, Gao Y, Palsson BO. 2010.  
320 Genetic basis of growth adaptation of *Escherichia coli* after deletion of *pgi*, a major metabolic gene. *PLoS*  
321 *Genet* 6:e1001186.
- 322 Chaudhury S, Lyskov S, Gray JJ. 2010. PyRosetta: a script-based interface for implementing molecular  
323 modeling algorithms using Rosetta. *Bioinformatics* 26:689-691.
- 324 Cock PJ, Antao T, Chang JT, Chapman BA, Cox CJ, Dalke A, Friedberg I, Hamelryck T, Kauff F,  
325 Wilczynski B, et al. 2009. Biopython: freely available Python tools for computational molecular biology  
326 and bioinformatics. *Bioinformatics* 25:1422-1423.
- 327 Conrad TM, Frazier M, Joyce AR, Cho BK, Knight EM, Lewis NE, Landick R, Palsson BO. 2010. RNA  
328 polymerase mutants found through adaptive evolution reprogram *Escherichia coli* for optimal growth in  
329 minimal media. *Proc Natl Acad Sci U S A* 107:20500-20505.
- 330 Cooper VS, Lenski RE. 2000. The population genetics of ecological specialization in evolving  
331 *Escherichia coli* populations. *Nature* 407:736-739.
- 332 Coordinators NR. 2018. Database resources of the National Center for Biotechnology Information.  
333 *Nucleic Acids Res* 46:D8-D13.
- 334 Degen D, Feng Y, Zhang Y, Ebright KY, Ebright YW, Gigliotti M, Vahedian-Movahed H, Mandal S,  
335 Talaue M, Connell N, et al. 2014. Transcription inhibition by the depsipeptide antibiotic salinamide A.  
336 *Elife* 3:e02451.
- 337 Delgado MA, Rintoul MR, Farias RN, Salomon RA. 2001. *Escherichia coli* RNA polymerase is the target  
338 of the cyclopeptide antibiotic microcin J25. *J Bacteriol* 183:4543-4550.
- 339 Duchi D, Mazumder A, Malinen AM, Ebright RH, Kapanidis AN. 2018. The RNA polymerase clamp  
340 interconverts dynamically among three states and is stabilized in a partly closed state by ppGpp. *Nucleic*  
341 *Acids Res* 46:7284-7295.
- 342 Field W, Hershberg R. 2015. Alarming High Segregation Frequencies of Quinolone Resistance Alleles  
343 within Human and Animal Microbiomes Are Not Explained by Direct Clinical Antibiotic Exposure.  
344 *Genome Biol Evol* 7:1743-1757.
- 345 Graves JL, Jr., Tajkarimi M, Cunningham Q, Campbell A, Nonga H, Harrison SH, Barrick JE. 2015.  
346 Rapid evolution of silver nanoparticle resistance in *Escherichia coli*. *Front Genet* 6:42.
- 347 Gross J, Avrani S, Katz S, Hilau S, Hershberg R. 2020. Culture Volume Influences the Dynamics of  
348 Adaptation under Long-Term Stationary Phase. *Genome Biol Evol* 12:2292-2301.
- 349 Harden MM, He A, Creamer K, Clark MW, Hamdallah I, Martinez KA, 2nd, Kresslein RL, Bush SP,  
350 Slonczewski JL. 2015. Acid-adapted strains of *Escherichia coli* K-12 obtained by experimental evolution.  
351 *Appl Environ Microbiol* 81:1932-1941.
- 352 Herring CD, Raghunathan A, Honisch C, Patel T, Applebee MK, Joyce AR, Albert TJ, Blattner FR, van  
353 den Boom D, Cantor CR, et al. 2006. Comparative genome sequencing of *Escherichia coli* allows  
354 observation of bacterial evolution on a laboratory timescale. *Nat Genet* 38:1406-1412.
- 355 Hershberg R. 2017. Antibiotic-Independent Adaptive Effects of Antibiotic Resistance Mutations. *Trends*  
356 *Genet* 33:521-528.
- 357 Katz S, Avrani S, Yavneh M, Hilau S, Gross J, Hershberg R. 2021. Dynamics of Adaptation During  
358 Three Years of Evolution Under Long-Term Stationary Phase. *Mol Biol Evol* 38:2778-2790.

- 359 Kawecki TJ, Lenski RE, Ebert D, Hollis B, Olivieri I, Whitlock MC. 2012. Experimental evolution.  
360 Trends Ecol Evol 27:547-560.
- 361 Kvitek DJ, Sherlock G. 2013. Whole genome, whole population sequencing reveals that loss of signaling  
362 networks is the major adaptive strategy in a constant environment. PLoS Genet 9:e1003972.
- 363 Lan Y, Rosen G, Hershberg R. 2016. Marker genes that are less conserved in their sequences are useful  
364 for predicting genome-wide similarity levels between closely related prokaryotic strains. Microbiome  
365 4:18.
- 366 MacLean RC, Bell G, Rainey PB. 2004. The evolution of a pleiotropic fitness tradeoff in *Pseudomonas*  
367 *fluorescens*. Proc Natl Acad Sci U S A 101:8072-8077.
- 368 Maddamsetti R, Hatcher PJ, Green AG, Williams BL, Marks DS, Lenski RE. 2017. Core Genes Evolve  
369 Rapidly in the Long-Term Evolution Experiment with *Escherichia coli*. Genome Biol Evol 9:1072-1083.
- 370 Nandy P, Chib S, Seshasayee A. 2020. A Mutant RNA Polymerase Activates the General Stress  
371 Response, Enabling *Escherichia coli* Adaptation to Late Prolonged Stationary Phase. mSphere 5.
- 372 Opalka N, Brown J, Lane WJ, Twist KA, Landick R, Asturias FJ, Darst SA. 2010. Complete structural  
373 model of *Escherichia coli* RNA polymerase from a hybrid approach. PLoS Biol 8.
- 374 Ponting CP, Russell RR. 2002. The natural history of protein domains. Annu Rev Biophys Biomol Struct  
375 31:45-71.
- 376 Reynolds MG. 2000. Compensatory evolution in rifampin-resistant *Escherichia coli*. Genetics 156:1471-  
377 1481.
- 378 Rice P, Longden I, Bleasby A. 2000. EMBOSS: the European Molecular Biology Open Software Suite.  
379 Trends Genet 16:276-277.
- 380 Rodriguez-Verdugo A, Tenaillon O, Gaut BS. 2016. First-Step Mutations during Adaptation Restore the  
381 Expression of Hundreds of Genes. Mol Biol Evol 33:25-39.
- 382 Sandberg TE, Long CP, Gonzalez JE, Feist AM, Antoniewicz MR, Palsson BO. 2016. Evolution of *E.*  
383 *coli* on [U-13C]Glucose Reveals a Negligible Isotopic Influence on Metabolism and Physiology. PLoS  
384 One 11:e0151130.
- 385 Severinov K, Soushko M, Goldfarb A, Nikiforov V. 1993. Rifampicin region revisited. New rifampicin-  
386 resistant and streptolydigin-resistant mutants in the beta subunit of *Escherichia coli* RNA polymerase. J  
387 Biol Chem 268:14820-14825.
- 388 Spratt BG. 1994. Resistance to antibiotics mediated by target alterations. Science 264:388-393.
- 389 Srivastava A, Degen D, Ebricht YW, Ebricht RH. 2012. Frequency, spectrum, and nonzero fitness costs  
390 of resistance to myxopyronin in *Staphylococcus aureus*. Antimicrob Agents Chemother 56:6250-6255.
- 391 Sutherland C, Murakami KS. 2018. An Introduction to the Structure and Function of the Catalytic Core  
392 Enzyme of *Escherichia coli* RNA Polymerase. EcoSal Plus 8.
- 393 Tenaillon O, Rodriguez-Verdugo A, Gaut RL, McDonald P, Bennett AF, Long AD, Gaut BS. 2012. The  
394 molecular diversity of adaptive convergence. Science 335:457-461.
- 395 UniProt C. 2021. UniProt: the universal protein knowledgebase in 2021. Nucleic Acids Res 49:D480-  
396 D489.
- 397 Wrands M, Roth JR, Hughes D. 2008. Accumulation of mutants in "aging" bacterial colonies is due to  
398 growth under selection, not stress-induced mutagenesis. Proc Natl Acad Sci U S A 105:11863-11868.
- 399 Yates AD, Achuthan P, Akanni W, Allen J, Allen J, Alvarez-Jarreta J, Amode MR, Armean IM, Azov  
400 AG, Bennett R, et al. 2020. Ensembl 2020. Nucleic Acids Res 48:D682-D688.

401 Zhang G, Campbell EA, Minakhin L, Richter C, Severinov K, Darst SA. 1999. Crystal structure of  
402 *Thermus aquaticus* core RNA polymerase at 3.3 Å resolution. *Cell* 98:811-824.

403 Zhang T, Shi XC, Xia Y, Mai L, Tremblay PL. 2019. *Escherichia coli* adaptation and response to  
404 exposure to heavy atmospheric pollution. *Sci Rep* 9:10879.

405

406

407

408 **Table 1.** Summary of RNAPC positions involved in rapid adaptation.

| Selective pressure                            | Strain         | Number of positions involved in adaptation | RpoB positions involved in adaptation                                                                                                                                                                                          | RpoC positions involved in adaptation                                                                   | References                                                                                                                         |
|-----------------------------------------------|----------------|--------------------------------------------|--------------------------------------------------------------------------------------------------------------------------------------------------------------------------------------------------------------------------------|---------------------------------------------------------------------------------------------------------|------------------------------------------------------------------------------------------------------------------------------------|
| Antibiotic exposure                           | K-12<br>MG1655 | 38                                         | 146;148;509;511;512; <b>513;516;522;526*</b> ;529;531;533;544;545;563;564;569; <b>572*</b> ;574;675; <b>677</b> ;687; <b>1275</b> ;1279;1296; <b>1322</b> ;                                                                    | 690;697; <b>738</b> ;<br>748;758;763;<br>775; <b>779</b> ;780;<br><b>782</b> ;783;931;                  | (Severinov, et al. 1993; Reynolds 2000; Wrande, et al. 2008; Srivastava, et al. 2012; Degen, et al. 2014; Field and Hersberg 2015) |
| Prolonged resource exhaustion                 | K-12<br>MG1655 | 16                                         | 814;1237;1244;1268; <b>1272</b> ;1277;1321;1325;                                                                                                                                                                               | 334;375;428;<br>434;469;504;<br>621;1357*;                                                              | (Avrani, et al. 2017; Gross, et al. 2020; Katz, et al. 2021)                                                                       |
| Heat shock                                    | K-12<br>MG1655 | 56                                         | <b>84</b> ;97;143;151;365;372;<br>375;539;553;556;566;<br><b>572*</b> ;664; <b>725;745;747</b> ;<br>758;760;806;866;948;958;960;965; <b>966</b> ;967;<br>1014;1078;1081;1210;1236;1243;1245;1250;1297;1316; <b>1323</b> ;1330; | 106;218;223;<br>290;369;373;<br>493;511;825;<br>833;866;903;<br>1099;1127;<br>1130;1315;<br>1336;1357*; | (Tenailon, et al. 2012)                                                                                                            |
| Radiation                                     | K-12<br>MG1655 | 2                                          | 72;                                                                                                                                                                                                                            | 1172;                                                                                                   | (Bruckbauer, et al. 2019)                                                                                                          |
| Glucose minimal media                         | K-12<br>MG1655 | 5                                          | 546;671;672;673;1100;                                                                                                                                                                                                          |                                                                                                         | (Conrad, et al. 2010)                                                                                                              |
| Glycerol                                      | K-12<br>MG1655 | 2                                          | 562;                                                                                                                                                                                                                           | 750;                                                                                                    | (Herring, et al. 2006)                                                                                                             |
| Deletion of major metabolic gene              | K-12<br>MG1655 | 2                                          | 1242;                                                                                                                                                                                                                          | 1174;                                                                                                   | (Charusanti, et al. 2010)                                                                                                          |
| <sup>13</sup> C Glucose                       | K-12<br>MG1655 | 2                                          | 657,1189                                                                                                                                                                                                                       |                                                                                                         | (Sandberg, et al. 2016)                                                                                                            |
| Heavy metal                                   | K-12<br>MG1655 | 3                                          | 520;526*;                                                                                                                                                                                                                      | 395;                                                                                                    | (Graves, et al. 2015)                                                                                                              |
| Atmospheric pollution                         | BW25113        | 1                                          | 12;                                                                                                                                                                                                                            |                                                                                                         | (Zhang, et al. 2019)                                                                                                               |
| Resource exhaustion starting with RpoS mutant | K-12<br>MG1655 | 1                                          |                                                                                                                                                                                                                                | 494;                                                                                                    | (Nandy, et al. 2020)                                                                                                               |
| Acidic conditions                             | K-12 3110      | 3                                          | 679                                                                                                                                                                                                                            | 507,774                                                                                                 | (Harden, et al. 2015)                                                                                                              |

409 Positions marked in bold undergo at least two different types of mutations in response to a single selective pressure. Positions  
410 marked by an asterisk are involved in adaptation to more than a single selective pressure.

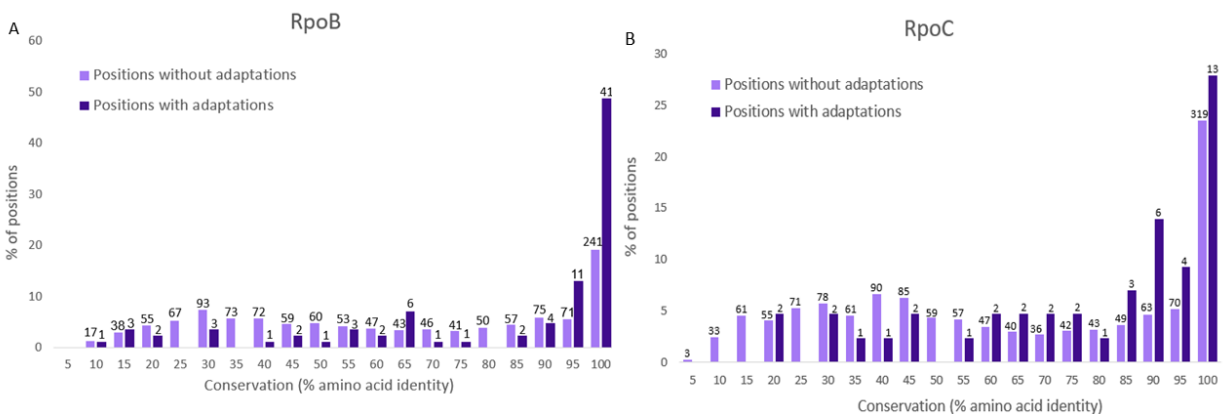

411  
412 **Figure 1. Positions in which known rapid adaptations occur tend to be more conserved than those in**  
413 **which no such adaptation is known.** Depicted in each graph are the distributions of conservation levels  
414 of RpoB (A) and RpoC (B) positions, divided into positions in which known adaptive mutations were found  
415 to occur (dark blue) and those in which no such adaptive mutations were yet identified (lavender). Numbers  
416 above each bar indicate the numbers of positions falling within each conservation bin. Positions in which  
417 known adaptations occur are significantly more conserved for both RpoB ( $P \ll 0.001$ ) and RpoC ( $P =$   
418  $0.0064$ ).  
419



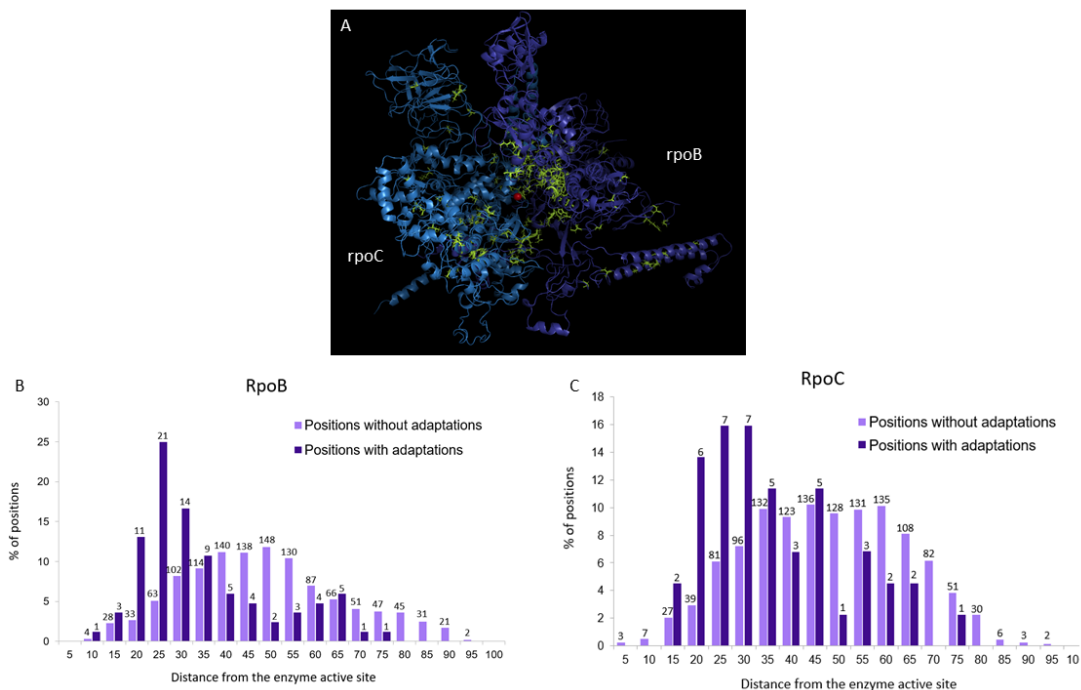

420  
 421 **Figure 2. Positions involved in adaptation tend to be located closer to the RNAPC active site.** (A) The  
 422 solved protein structure of the RpoB-RpoC complex is presented (PDB accession 3LU0), with positions in  
 423 which adaptations occur marked in green. Positions of both RpoB (A) and RpoC (B) at which known  
 424 adaptations occur tend to be located significantly ( $P \ll 0.001$ ) closer to the protein complex's active site.  
 425

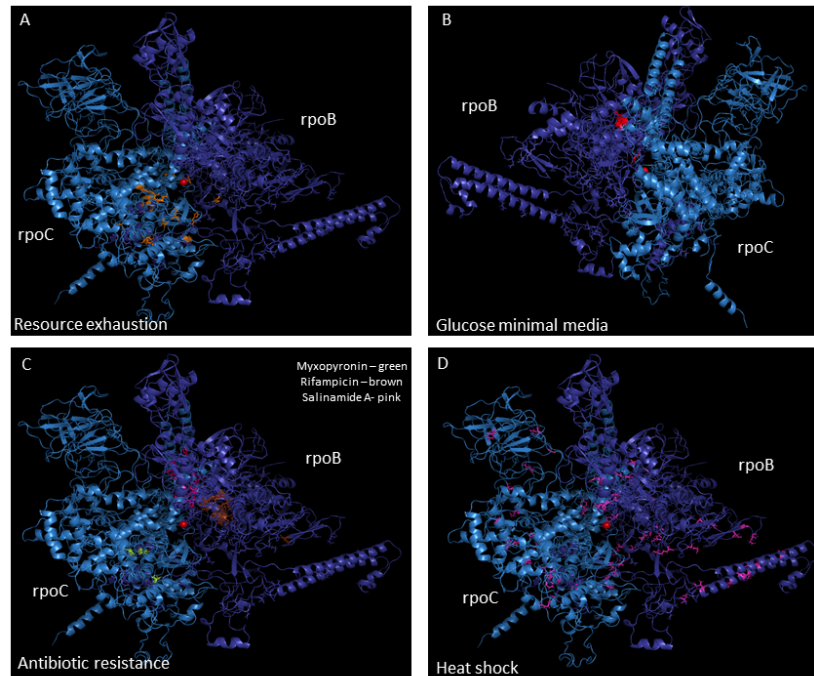

426

427 **Figure 3. Locations of known adaptations on the solved protein structure of the RpoB-RpoC complex.**

428 The RpoB-RpoC protein structure was taken from (PDB accession 3LU0). Positions where known rapid  
429 adaptations occur marked on the structure: (A) Prolonged resource exhaustion adaptations. (B) Glucose  
430 minimal media adaptations. (C) Antibiotic resistance adaptations. (D) Heat shock adaptations.

431
